1 **Post-fire changes in plant growth form**  
2 **composition in Andean páramo grassland**

3 **Maya A. Zomer<sup>1</sup>, Paul M. Ramsay<sup>1,2,\*</sup>**

4 <sup>1</sup>School of Biological and Marine Sciences, University of Plymouth, Plymouth, PL4 8AA, UK

5 <sup>2</sup>Departamento de Ciencias Químico-Biológicas, Universidad de las Américas Puebla, San  
6 Andrés Cholula, Puebla, México

7 **\*Corresponding author:** Departamento de Ciencias Químico-Biológicas, Universidad de  
8 las Américas Puebla, San Andrés Cholula, Puebla, México; paul.ramsay@udlap.mx

9 ORCID IDs:

10 Maya A. Zomer 0000-0002-3831-7113

11 Paul M. Ramsay 0000-0001-7631-6480

---

12

## 13 **Abstract**

### 14 Questions

15 Fire suppression policies have been widely adopted in the páramo grasslands of the northern  
16 Andes to protect their biodiversity and ecosystem services. Páramos have been regularly  
17 burned for many years, and it is not clear how páramo vegetation will respond to significant  
18 changes in their fire regimes. This study investigates differences in plant growth form  
19 composition, light levels and soil temperatures in páramo plots representing a range of  
20 recovery times since the last fire.

### 21 Location

22 Reserva Ecológica El Ángel and La Bretaña Nature Reserve, Carchi, Northern Ecuador.

### 23 Methods

24 We assessed the frequency of ten páramo growth forms, vegetation height, soil temperature,  
25 and light intensity in fifteen fire sites with historical records of fire (<1 – 15 years since fire), and  
26 one recently unburned site (at least 40 years since fire). A chronosquence of sites was used to  
27 assess potential changes in plant community composition in post-fire succession of páramo.

### 28 Results

29 The recovery of páramo vegetation after fire comprised three phases: initial recruitment with  
30 high growth form diversity, followed by reduced diversity, light and soil temperatures in dense  
31 tussock vegetation, and ultimately canopy height stratification with a return of diversity. All but  
32 one plant growth forms were represented in each of the three phases, and the changes  
33 reflected differences in relative abundance.

### 34 Conclusions

35 Post-fire páramo succession is characterized by clear shifts in the relative abundance of plant  
36 growth forms, ending with (co-)dominance of upright shrubs. The long-term consequences of  
37 such shifts for biodiversity and ecosystem function, given the widespread adoption of fire  
38 suppression policies in the páramo need careful, evidence-based consideration.

39 Key words: burning, succession, vegetation recovery, phase shift, fire ecology, fire  
40 management, tropical alpine, Ecuador

## 41 **Introduction**

42 The páramos are the largest extension of tropical alpine ecosystems, forming a discontinuous  
43 belt throughout the northern Andes, with outliers in Panama and Costa Rica. The páramo has  
44 the most diverse mountain flora in the world (Smith and Cleef 1988), and these grasslands  
45 sustain ecological processes, carbon storage, and supply water for millions of people,  
46 agriculture and industry at lower latitudes (Buytaert et al. 2011).

47 Fires are the most significant human impact in the páramos (Horn and Kappelle 2009; Laegaard  
48 1992; Ramsay and Oxley 1996) and people have burned these grasslands for thousands of years  
49 (White 2013). Putative fire suppression policies have been introduced to counter a reported  
50 increase in burning frequencies in some areas (Armenteras et al. 2020), a conservation strategy  
51 that stems from the common perception of fire as a threat to ecosystem integrity and services  
52 in the high Andes (Horn and Kappelle 2009; Keating 2007; Matson and Bart 2013).

53 Understanding biodiversity and community level responses to such strategic decisions in the  
54 páramo requires an in depth knowledge of both fire regimes and how páramo vegetation  
55 recovers through time after fire (Matson and Bart 2013; Ramsay 2001).

56 Fire disturbance might represent a powerful mechanism of promoting and maintaining species  
57 diversity in páramo grasslands (Horn and Kappelle 2009; Keating 2007; Sklenář and Ramsay  
58 2001). Regular burning in the páramo promotes a destruction-renewal cycle that has resulted in  
59 a landscape composed of a mosaic of patches in varying stages of recovery (Grubb 1977;  
60 Ramsay 1999; Ramsay 2001; Smith and Young 1987). Fine-scale heterogeneity in vegetation  
61 structure leads to patchy distribution of fuel and variable fire temperatures, which results in  
62 differential plant mortality, and post-fire establishment and growth (Ramsay 2001; Ramsay and  
63 Oxley 1996). Such patchiness and variability in recovery after fire have been linked to higher  
64 levels of biodiversity at the landscape scale (Keating 2007; Sklenář and Ramsay 2001) and at a  
65 finer scales (Ramsay and Oxley 1996; Sarmiento and Frolich 2002).

66 Studies of post-fire vegetation development have been carried out in Ecuador, Colombia,  
67 Venezuela, and Costa Rica and have shown variable changes in composition, cover and stature  
68 (Horn and Kappelle 2009). Only a few studies have monitored vegetation recovery through time  
69 after fires in Ecuador. Bremer et al. (2019), Keating (2007) and Ramsay (2001) concluded that  
70 páramo vegetation recovery does not follow one particular successional trajectory. Fires can

71 have very different effects on vegetation, depending on the intensity and extent of a particular  
72 fire (Keating 2007; Luteyn 1999; Sklenář and Ramsay 2001; Suárez and Medina 2001; Zomer  
73 and Ramsay in review). Fire behaviour is determined by the pre-fire community structure  
74 (physical vegetation structure and fuel accumulation) and fire event conditions (Zomer and  
75 Ramsay in review).

76 Rates of tussock grass regeneration have been observed to be high (Gutiérrez-Salazar and  
77 Ramsay in press), but the impacts of fire on other páramo life forms vary widely (Horn 1989;  
78 Horn 1997; Janzen 1973; Keating 1998). Most páramo species have adaptations that help them  
79 to survive fires (Laegaard 1992), but the mechanisms vary among species, making the  
80 recognition of community-level successional trends at this taxonomic level difficult. A credible  
81 alternative for recognizing community assembly patterns is the use of plant functional types  
82 (Smith and Huston 1989): “nonphylogenetic groupings of species that show close similarities in  
83 their resource use and response to environmental and biotic controls” (Wilson 1999). To assist  
84 in such studies, Ramsay and Oxley (1997) proposed ten plant growth forms for the páramos,  
85 each summarising the responses of its component species.

86 One difficulty in developing a better understanding of páramo fire ecology is the lack of well-  
87 documented study sites. Some studies have observed post-fire recovery without knowing what  
88 conditions were like before or during the fire (e.g., Kovář 2001; Ramsay 2001). In other cases,  
89 fires have been set experimentally, sometimes with the addition of a fire stimulant (Keating  
90 1998; Ramsay and Oxley 1996). Longer term studies are impeded by the lack of fire records,  
91 noting when, where and how páramo fires took place (Bremer et al. 2019; Horn and Kappelle  
92 2009; Matson and Bart 2013).

93 Using a fire register for the Reserva Ecológica El Ángel, northern Ecuador, we recorded diversity  
94 and abundance of growth forms in a chronosequence (space for time substitution; Walker et al.  
95 2010) of páramo sites burned from 2000–2014, and from a site that had not been burned for at  
96 least 40 years. We also measured light levels and soil temperatures in the same plots. Our aim  
97 was to determine the key phases in post-fire vegetation succession in the páramo, and the  
98 mechanisms driving the changes.

## 99 **Methods**

### 100 **Study areas and fire records**

101 The Reserva Ecológica El Ángel (REEA) is located in the Western Cordillera of northern Ecuador,  
102 and protects part of a contiguous páramo that is shared with Colombia. The buffer zone around  
103 the reserve is dominated by agricultural land use, where fires often occur. In the past, fires  
104 have also been common in parts of the reserve itself. Typically, such fires were started to  
105 stimulate livestock forage, aid hunting, or happened by accident (Ramsay 2001). An inventory  
106 of known fires since 2000 in the reserve and its buffer zone has been kept with the help of  
107 reserve officials and local fire brigades (Bustos Insuasti 2008; Valdospinos Navas 2008). More  
108 recently, the fire brigade in San Pedro de Huaca, Carchi, has also begun recording páramo fires  
109 for parts of the Eastern Cordillera in northern Ecuador, providing further opportunities for  
110 study.

111 Using these records, twelve sites in REEA and its buffer zone (Western Cordillera) and three  
112 additional sites from the páramo of La Bretaña (Eastern Cordillera) were selected for study,  
113 representing fires that burned from 2000–2014, from <1 to 15 y before our survey, at  
114 elevations of 3500–3900 m. Each fire site was located with GPS coordinates obtained from the  
115 records. In addition, one site known to be unburned for at least 40 years was included, making  
116 a total of 16 study sites. The páramo grasslands of these study areas were dominated by  
117 *Calamagrostis* tussock grasses and giant rosettes of *Espeletia pycnophylla* Cuatrec. (at densities  
118 of 1300–5400 adult plants ha<sup>-1</sup>).

### 119 **Data collection in the field**

120 One 50m x 2m plot was randomly selected within each fire site. The plot was divided into 100 x  
121 1 m<sup>2</sup> quadrats. In each of these 1 m<sup>2</sup> quadrats, the presence or absence of ten páramo plant  
122 growth forms, defined by Ramsay and Oxley (1997), was recorded: stem rosettes, basal  
123 rosettes, tussock grasses, acaulescent rosettes, cushions/mats, upright shrubs, prostrate  
124 shrubs, erect herbs, prostrate herbs, and trailing herbs.

125 Vegetation height was measured in each 1 m<sup>2</sup> quadrat using the drop-disc technique (Stewart  
126 et al. 2001), with a 20 cm diameter disc, 190 g in weight, allowed to fall to rest on top of the  
127 vegetation (excluding *Espeletia*).

128 Soil temperature was measured at 20 cm depth using Signstek 3 1/2 6802 II Dual Channel  
129 Digital Thermometer with 2 K-type thermocouple sensor probes. Measurements were taken at  
130 five regular intervals along the longest axis of each plot, at 5 m, 15 m, 25 m, 35 m, and 45 m. At

131 each place a temperature reading was taken in each of three shading conditions: beneath  
132 dense tussocks (shaded), on the edge of tussocks (intermediate) and in open intertussock areas  
133 (open).

134 Light at ground level was determined by measuring the percentage of incident  
135 photosynthetically active radiation (PAR) using a SunScan Canopy Analysis System with BF2  
136 Beam Fraction Sensor (Delta-T Devices Ltd, Cambridge, UK) . The sunscan probe was held at  
137 ground level underneath the vegetation at 1 m intervals along the length of the plot (50 in  
138 total). Each reading consisted of 64 simultaneous measurements of the percentage of total light  
139 (above the canopy) reaching the sensors on the ground. The median percentage of the light  
140 above the canopy which reached ground level was calculated for each 1 m interval along the  
141 transect, and subsequent analysis was based on these median values ( $n=50$  for each plot).

142 Shannon's diversity index (using  $\log_e$ ) was calculated for growth forms for all sites. Non-metric  
143 multidimensional scaling (MDS) was carried out with Primer 6 (PRIMER-E, Plymouth, UK) to  
144 compare growth form composition between the fire intensity plots. Other standard statistical  
145 tests were performed with R version 3.4 (R Core Team 2019).

## 146 **Results**

147 Diversity of growth forms in sites through time after fire followed a three phased pattern (Fig  
148 1). In phase 1, there was a rapid increase to the highest levels of diversity within 2 years.  
149 Unfortunately, we had access to just one site <1.5 y after fire. In phase 2, diversity decreased,  
150 with the lowest levels occurring 8–10 y after fire. The bulk of our plots were burned within this  
151 time range. In phase 3, diversity increased from 10 to 15 y after fire and was even higher in the  
152 plot which had not been burned for at least 40 y, almost reaching the same level of diversity  
153 registered in at the start of phase 2.

154 Changes in the composition of plant growth forms did not follow a straightforward pattern (Fig.  
155 2). Community compositions were fairly similar among sites 1.5–5.6 y after fire and among sites  
156 8–10 y after fire. The unburned control was most similar in composition to sites 1.5–5.6 y after  
157 fire.

158 Analysis of only those sites burned 1.5–10 y after fire (Phase 2 in Fig. 1) shows that diversity  
159 decreased as time since fire increased (regression:  $F_{1,11}=14.3$ ,  $p=0.003$ ; Fig 3a). Richness of  
160 growth forms did not vary significantly through time from 1.5 to 10 y after fire (regression:

161  $F_{1,11}=0.145$ ,  $p=0.710$ ; Fig. 3b). The majority of sites had nine of the ten growth forms present.  
162 Lowest richness was found in two sites, both 9 y after fire (five and seven growth forms  
163 respectively).

164 The frequencies of several growth forms within the 100 m<sup>2</sup> plots decreased as time since fire  
165 increased from 1.5 to 10 y: prostrate herbs (regression:  $F_{1,11}=10.1$ ,  $p=0.009$ ; Fig. 4A), prostrate  
166 shrubs (regression:  $F_{1,11}=17.9$ ,  $p=0.001$ ; Fig. 4B), cushions and mats (regression:  $F_{1,11}=6.9$ ,  
167  $p=0.024$ ; Fig. 4C), and giant basal rosettes (regression:  $F_{1,11}=9.3$ ,  $p=0.011$ ; Fig. 4D).

168 Six growth forms did not follow a distinct pattern of changing frequencies from 1.5–10 y after  
169 fire. Tussock grasses were present at high frequency in all plots (99%–100%; Fig. 5A). Giant  
170 stem rosettes varied in frequency (40–99%; Fig. 5B), as did upright shrubs (20–65%; Fig. 5C) and  
171 erect herbs (1–81%; Fig. 5D). Acaulescent rosettes were found at low abundance (0–11%; Fig  
172 5E), and trailing herbs were absent from most plots and were found just once each in two plots  
173 (Fig. 5F).

174 Mean vegetation height increased by approximately 25 cm on average as time since fire  
175 increased from 1.5–10 y (regression:  $F_{1,11}=13.7$ ,  $p=0.040$ ; Fig 6A). In contrast, soil temperatures  
176 at depth decreased (regression,  $F_{1,11}=34.3$ ,  $p<0.001$ ; Fig 6B). Median percentages of incident  
177 PAR reaching ground level decreased (regression:  $F_{1,647}= 491.0$ ,  $p<0.001$ ,; Fig. 6C), while the  
178 proportion of ground with heavy shading (<10% incident light at ground level) increased as time  
179 since fire increased from 1.5–10 y since fire (regression:  $F_{1,11}=23.7$ ,  $p<.001$ ; Fig. 6D). For  
180 context, the plot unburned for at least 40 y had a median PAR of 12.4% and the proportion of  
181 the readings with heavy shading was 62%.

## 182 **Discussion**

183 This study considered broad patterns in plant growth forms, since it is the interaction between  
184 these forms that helps to explain the mechanisms of succession. However, many distinct  
185 species belong to each growth form, and do not all respond to fires in a similar way. Further  
186 investigation is needed at the species level to fully understand the implications for biodiversity  
187 of different successional trajectories or fire suppression. Particular attention should be focused  
188 on endemic species and other species of conservation concern (Matson and Bart 2013), as well  
189 as the contribution of different páramo growth forms to the provision of ecosystem services  
190 (Bremer et al. 2019).

191 Although community assembly dynamics are known to be highly variable after páramo fires  
192 (Keating 2007; Ramsay 2001), our study highlighted three key phases in terms of growth form  
193 diversity and composition. The mechanisms responsible for these successional patterns are  
194 proposed here to be the consequence of differential survival and recruitment after fire,  
195 followed by competitive interactions between growth forms, driving temporal changes in  
196 environmental conditions as the structure of vegetation developed (summarised in Fig. 7, and  
197 discussed in more detail below).

### 198 **Fire event leading to Phase 1**

199 Vegetation composition soon after a fire is determined by plants' fire survival strategies and  
200 their regeneration mechanisms immediately after fire. Subsequently, most plants are able to  
201 grow well in light conditions and warmer soil temperatures. This phase can be considered  
202 founder-controlled, where the abundance of plants is driven by survival and recruitment  
203 processes.

204 Tussock plants are rarely killed by fires (Hofstede et al. 1995) as their deeply-seated shoot  
205 apices and buds are protected against heat in the centre of the tussock base (Laegaard 1992;  
206 Ramsay and Oxley 1996). Nevertheless, partial mortality is often observed, leading to  
207 fragmentation of plants and a smaller basal area (Gutiérrez-Salazar and Ramsay in press;  
208 Laegaard 1992; Ramsay 1999; Suárez and Medina 2001). In the initial recovery phase after a  
209 fire, there is a tussock-building phase caused by the growth of surviving fragments and  
210 recruitment of new seedlings in open areas (Ramsay 2001; Ramsay and Oxley 1996; Vargas-Ríos  
211 1997; Vargas Ríos 2011). During this period, the height of tussocks is restricted, permitting  
212 more light at ground level and increased soil temperatures (Gutiérrez-Salazar and Ramsay in  
213 press). This allows other growth forms time and space to recover after the fire.

214 Adult giant stem rosettes tolerate fire well, protecting apical buds in at the heart of their  
215 rosettes (Laegaard 1992). Germination and establishment of *Espeletia pycnophylla*, co-  
216 dominant in our study plots, is known to be enhanced after fires (Laegaard 1992; Suárez and  
217 Medina 2001). This is consistent with the initial rise in frequency of giant stem rosettes in our  
218 study, which also included *Blechnum* stem rosette ferns.

219 Giant basal rosettes (*Puya hamata* in our plots) also survive fires well by shielding their buds  
220 against high fire temperatures (Garcia-Meneses and Ramsay 2014). Recruitment of new *Puya*



221 plants can be enhanced significantly in the open conditions that are typical after a páramo fire,  
222 but only if seed-producing adults are present nearby since seed dispersal is poor (Garcia-  
223 Meneses and Ramsay 2014; Miller and Silander 1991). This can result patchy distribution  
224 patterns of *Puya* at the landscape scale, with consequences for the behaviour of pollinating  
225 hummingbirds and the genetic diversity of the plants and their seeds (Garcia-Meneses and  
226 Ramsay 2012; Rivadeneira et al. 2020).

227 Some upright shrubs regenerate well after fire, from insulated buds or roots (Horn and Kappelle  
228 2009; Ramsay and Oxley 1996) and the abundance of some species might benefit from  
229 repeated burning (Keating 2007). The abundance of upright shrubs in our plots did not change  
230 markedly with time since fire, suggesting plants maintained their presence from the early  
231 stages of recovery, perhaps with occasional colonization from seed.

232 Other growth forms survive fires at or below the soil surface, where fire temperatures are  
233 lower (Ramsay and Oxley 1996): cushion and mats, acaulescent rosettes, prostrate herbs,  
234 prostrate shrubs, and erect herbs. Survivors of these growth forms, plus new plants recruited  
235 from seed rain (Vargas-Ríos 1997), benefit from the open conditions during this initial phase to  
236 establish and grow.

237 Trailing herbs, usually growing through the canopies of tussocks do not survive fires well, since  
238 they hold their buds in the zone of maximum fires temperatures (Ramsay and Oxley 1996).  
239 Plants belonging to this growth form are less abundant in burned páramos, and they were  
240 completely absent from our plots in the early phase of post-fire recovery. It is worth noting that  
241 even growth forms which are vulnerable to mortality from fire can survive by chance in small  
242 islands of vegetation that the fire missed (Laegaard 1992). The relative abundance of these  
243 islands, and their later importance in determining the composition of the vegetation merits  
244 more attention.

## 245 **Phase 2**

246 Phase 2 of recovery showed a decrease in growth form diversity from 1.5–10 y after fire,  
247 though growth form richness did not vary greatly. The compositional analysis also supports the  
248 conclusion that the changes reflect shifts in relative abundance rather than local exclusion of  
249 growth forms.

250 In this second phase, tussock grasses increase their dominance. Gutiérrez-Salazar and Ramsay  
251 (in press) have shown that the height of the tussocks increases steadily during this phase,  
252 resulting in a consistent shading effect and decline in temperature at ground level. The  
253 dominance-controlled plant community during Phase 2 is thus characterized by the suppression  
254 of potential competitors by the tussocks.

255 The lack of light and lower temperatures at the soil surface inhibits the establishment of growth  
256 forms that grow over the soil surface (prostrate herbs, prostrate shrubs, cushions). Although  
257 large giant basal rosettes prevent neighbouring tussocks from shading their leaves, smaller  
258 plants are vulnerable to being outcompeted for light by taller tussocks. It is this loss of smaller  
259 plants and low recruitment of new plants beneath the tussock canopy that explains their  
260 decline during Phase 2 (Garcia-Meneses and Ramsay 2014).

261 Long-lived giant stem rosettes and upright shrubs did not show any consistent trend in  
262 response to time since fire during this second phase of succession. Their height means they are  
263 mostly unaffected by the density of the tussock grass canopy.

264 The abundance of acaulescent rosettes was relatively low, but stable, throughout this phase.  
265 These plants favour the canopy gaps where more light reached the ground (all plots had some  
266 places which received 50–60% incident light at ground level). Although these gaps were rare in  
267 plots representing the later stages of phase 2, they still provided appropriate conditions for  
268 some acaulescent rosettes. Erect herbs often grow alongside the tussock leaves in the canopy,  
269 or in canopy gaps, and did not show a trend through time in Phase 2.

270 Trailing herbs were only found in sites 8–10 y after fire. They rely on physical support of tussock  
271 grasses, but their late arrival suggests poor seed dispersal and/or germination for the species  
272 present in our study area.

273 It is noteworthy that one plot, 7 y after fire, was dissimilar in composition to the other plots. It  
274 was located on the edge of REEA's buffer zone, adjacent to agricultural fields, and was the only  
275 plot in this study to be regularly grazed by cows. This grazing had a visible effect on the  
276 vegetation with large spaces between tussocks, providing suitable light conditions for a greater  
277 abundance of erect herbs and acaulescent rosettes, but with far fewer *Espeletia* stem rosettes.  
278 Grazing disturbance often occurs alongside fire in páramo grasslands and such combined

279 disturbance regimes maintain fragmented tussock grasses and more open conditions (Hofstede  
280 et al. 1995; Ramsay and Oxley 1996; Verweij and Kok 1992).

### 281 **Phase 3**

282 The longer-term absence of fire in some parts of our study area gave some insight into  
283 successional change in plots 10 y or more after fire: Phase 3 in our proposed scheme. During  
284 this phase, the diversity of growth forms increased with another shift in relative abundances.  
285 Our “control” plot, unburned for at least 40 y, had growth form diversity and composition  
286 similar to the highest levels recorded in sites 1.5–5.6 y after fire. This was an unexpected  
287 trajectory, and while it is important to be cautious before assuming this observation is typical, it  
288 raises some interesting ideas about what might happen if more páramo areas were fire-free.

289 In our study, the 15 y since fire and the older “control” site had notably less tussock grass cover  
290 (only 89% and 79% frequency respectively) and the highest frequencies of upright shrubs (68%  
291 and 73% respectively). It seems that upright shrubs begin to outcompete the tussock grasses as  
292 time since fire passes. Such woody encroachment into unburned grassy páramo has been  
293 suggested before (e.g., Laegaard 1992), and could be maintained by positive feedbacks in  
294 temperature, soil moisture or nutrient availability (Brandt et al. 2013; Matson and Bart 2013).  
295 Woody encroachment is a concern to environmental managers of grasslands because it can  
296 alter ecosystem structure and function (Knapp et al. 2008; Zavaleta and Kettley 2006) and can  
297 lead to declines in biodiversity (Costello et al. 2000; Ratajczak et al. 2012). The implications of  
298 growth form shift in unburned páramos for services such as water provision and carbon storage  
299 is unclear. High vegetation cover of tussock grasses is often associated with protecting and  
300 promoting the ecosystem function of páramo soils, *i.e.*, providing water regulation, storing and  
301 sequestering soil carbon (Bremer et al. 2019; Minaya Maldonado 2017). Molina et al. (2019)  
302 demonstrated higher rates of chemical weathering in páramo-zone soil under trees with soil  
303 beneath tussock grassland in southern Ecuador.

304 While our study and those of Matson and Bart (2013) and Bremer et al. (2019) suggest that  
305 diversity and growth form richness may not decrease in a shrub dominated páramo, species  
306 composition is likely to shift. It is not clear how many páramo species require disturbance gaps  
307 for their survival, but it is likely that many species of conservation interest would see reductions  
308 in their abundance in areas where burning was prevented for many decades.

309 From an ecological perspective, the existence of páramo without fire is a relatively recent and  
310 rare phenomena (White 2013) and is only beginning to be studied. If fire suppression does lead  
311 to the transition from grass páramo to a shrub dominated páramo with potentially altered  
312 ecosystem function, the potential consequences are of conservation concern and should be  
313 evaluated (Armenteras et al. 2020; Matson and Bart 2013). It is important to recognise that  
314 conservation-motivated policies to exclude fire in páramo areas might result in different  
315 ecological outcomes from those desired by the policy makers.

## 316 **Conclusions**

317 We suggest that the recovery of páramo vegetation after fire comprises three phases.  
318 Immediately after fire, a survival and recruitment phase occurs in more open conditions, with  
319 high diversity of growth forms. As time passes, the growth of tussock grasses prevents many  
320 other plants from establishing, reducing diversity. With yet more time, shading from taller  
321 plants thins out the tussock cover nearer the ground, allowing certain growth forms to establish  
322 which had been mostly excluded in the previous phase—leading to a return of growth form  
323 diversity. We have less confidence in this last phase, because of a lack of replication in our  
324 study, but it is consistent with observations reported by other researchers.

325 At present, the prominent fire management strategy in many páramo regions is to prohibit  
326 fires, with the aim of protecting the integrity of the grassland ecosystem, promoting carbon  
327 storage and water provision. It is not yet clear whether this strategy will result in the desired  
328 outcomes. Some authors have concluded that this conservation strategy is unrealistic and  
329 difficult to enforce with local farmers (Keating 2007), that total burn exclusion is unnecessary to  
330 conserve plant species richness, growth form richness or vegetation cover (Bremer et al, 2019),  
331 and that it is not consistent with the environmental and cultural history of these fire-dependent  
332 páramos (Horn and Kappelle 2009; White 2013). We agree with this assessment and urge policy  
333 makers to consider the ecological evidence associated with the strategies being adopted. At  
334 very least, long-term studies should be employed to monitor future changes in composition and  
335 ecosystem function in response to policies of fire suppression. It would be prudent to support  
336 important policy decisions with careful evidence-based consideration of the outcomes.

## 337 **Acknowledgements**

338 This work was carried out as part of permit MAE-DPAC-UPN-BD-IC-FLO-2015-004, issued by the  
339 Ecuadorian Ministry of Environment. Fieldwork was carried out by the authors, with assistance  
340 from Anna Masters, Cheryl McAndrew, Patricia Gutierrez Salazar, Alejandro Marchán & Juan  
341 Yépez Cardenas. Logistical support in REEA was provided by the reserve's administration and  
342 rangers, who also provided information from fire records. The fire brigade in San Pedro de  
343 Huaca gave us fire dates for the sites at La Bretaña.

## 344 **References**

- 345 Armenteras D, González TM, Vargas JO, Meza Elizalde MC, Oliveras I (2020) Incendios en  
346 ecosistemas del norte de Suramérica: avances en la ecología del fuego tropical en  
347 Colombia, Ecuador y Perú. *Caldasia* 42:16 doi:10.15446/caldasia.v42n1.77353
- 348 Brandt JS, Haynes MA, Kuemmerle T, Waller DM, Radeloff VC (2013) Regime shift on the roof of  
349 the world: Alpine meadows converting to shrublands in the southern Himalayas.  
350 *Biological Conservation* 158:116-127 doi:10.1016/j.biocon.2012.07.026
- 351 Bremer LL, Farley KA, DeMaagd N, Suárez E, Cárate Tandalla D, Vasco Tapia S, Mena Vásquez P  
352 (2019) Biodiversity outcomes of payment for ecosystem services: lessons from páramo  
353 grasslands. *Biodiversity and Conservation* 28:885-908 doi:10.1007/s10531-019-01700-3
- 354 Bustos Insuasti AM (2008) Propuesta metodológica para monitorear incendios de la vegetación  
355 en áreas protegidas aplicadas a la Reserva Ecológica El Ángel. Pontificia Universidad  
356 Católica Del Ecuador
- 357 Buytaert W, Cuesta-Camacho F, Tobón C (2011) Potential impacts of climate change on the  
358 environmental services of humid tropical alpine regions. *Global Ecology and*  
359 *Biogeography* 20:19-33 doi:10.1111/j.1466-8238.2010.00585.x
- 360 Costello DA, Lunt ID, Williams JE (2000) Effects of invasion by the indigenous shrub *Acacia*  
361 *sophorae* on plant composition of coastal grasslands in south-eastern Australia.  
362 *Biological Conservation* 96:113-121 doi:10.1016/S0006-3207(00)00058-6
- 363 Garcia-Meneses PM, Ramsay PM (2012) Pollinator response to within-patch spatial context  
364 determines reproductive output of a giant rosette plant. *Basic Appl Ecol* 13:516-523  
365 doi:10.1016/j.baae.2012.08.011
- 366 Garcia-Meneses PM, Ramsay PM (2014) *Puya hamata* demography as an indicator of recent fire  
367 history in the páramo of El Ángel and Volcán Chiles, Ecuador-Colombia. *Caldasia* 36:53-  
368 69 doi:10.15446/caldasia.v36n1.43891
- 369 Grubb PJ (1977) The maintenance of species-richness in plant communities: the importance of  
370 the regeneration niche. *Biological Reviews* 52:107-145 doi:10.1111/j.1469-  
371 185X.1977.tb01347.x
- 372 Gutiérrez-Salazar PM, Ramsay PM (in press) Physiognomic responses of páramo tussock grass  
373 to time since fire in northern Ecuador. *Revista Peruana de Biología*
- 374 Hofstede RGM, Chilito EJ, Sandoval EM (1995) Vegetative structure, microclimate, and leaf  
375 growth of a páramo tussock grass species, in undisturbed, burned and grazed  
376 conditions. *Vegetatio* 119:53-65 doi:10.1007/BF00047370

- 377 Horn SP (1989) Postfire vegetation development in the Costa Rican páramos. *Madroño* 36:93–  
378 114
- 379 Horn SP (1997) Postfire resprouting of *Hypericum irazuense* in the Costa Rican páramos: Cerro  
380 Asunción revisited. *Biotropica* 29:529–531 doi:10.1111/j.1744-7429.1997.tb00049.x
- 381 Horn SP, Kappelle M (2009) Fire in the páramo ecosystems of Central and South America. In:  
382 Cochrane MA (ed) *Tropical Fire Ecology: climate change, land use, and ecosystem*  
383 *dynamics*. Praxis, Chichester, UK, pp 505-539
- 384 Janzen DH (1973) Rate of regeneration after a tropical high elevation fire. *Biotropica* 5:117–122  
385 doi:10.2307/2989661
- 386 Keating PL (1998) Effects of anthropogenic disturbances on Paramo vegetation in Podocarpus  
387 National Park, Ecuador. *Physical Geography* 19:221–238  
388 doi:10.1080/02723646.1998.10642648
- 389 Keating PL (2007) Fire ecology and conservation in the high tropical Andes: observations from  
390 northern Ecuador. *Journal of Latin American Geography* 6:43 doi:10.1353/lag.2007.0003
- 391 Knapp AK et al. (2008) Shrub encroachment in North American grasslands: shifts in growth form  
392 dominance rapidly alters control of ecosystem carbon inputs. *Global Change Biology*  
393 14:615–623 doi:10.1111/j.1365-2486.2007.01512.x
- 394 Kovář P (2001) Effects of burning on *Espeletia pycnophylla* stands in the páramo of Volcán  
395 Chiles, Ecuador—a short-term case study. In: Ramsay PM (ed) *The Ecology of Volcán*  
396 *Chiles: high-altitude ecosystems on the Ecuador-Colombia border* Pebble & Shell,  
397 Plymouth, pp 113–118
- 398 Laegaard S (1992) Influence of fire in the grass páramo vegetation of Ecuador. In: Balslev H,  
399 Luteyn JL (eds) *Páramo: An Andean Ecosystem under Human Influence*. Academic Press,  
400 London, pp 151–170
- 401 Luteyn JL (1999) Páramos: a checklist of plant diversity, geographical distribution and botanical  
402 literature. The New York Botanic Garden, New York
- 403 Matson E, Bart D (2013) Interactions among fire legacies, grazing and topography predict shrub  
404 encroachment in post-agricultural paramo. *Landsc Ecol* 28:1829-1840  
405 doi:10.1007/s10980-013-9926-5
- 406 Miller GA, Silander JA, Jr. (1991) Control of the distribution of giant rosette species of *Puya*  
407 (Bromeliaceae) in the Ecuadorian páramos. *Biotropica* 23:124–133 doi:10.2307/2388297
- 408 Minaya Maldonado VG (2017) *Ecohydrology of the Andes Páramo Region*. Delft University of  
409 Technology and UNESCO-IHE Institute for Water Education
- 410 Molina A, Vanacker V, Corre MD, Veldkamp E (2019) Patterns in soil chemical weathering  
411 related to topographic gradients and vegetation structure in a High Andean tropical  
412 ecosystem. *Journal of Geophysical Research: Earth Surface* 124:666-685  
413 doi:10.1029/2018jf004856
- 414 R Core Team (2019) *R: A language and environment for statistical computing*. R Foundation for  
415 Statistical Computing, Vienna

- 416 Ramsay PM (1999) Landscape mosaics in the High Andes: the role of fire in paramo  
417 communities. In: Kovár P (ed) *Nature and Culture in Landscape Ecology: Experiences for*  
418 *the 3rd Millennium* The Karolinum Press, Prague, pp 192–199
- 419 Ramsay PM (2001) Páramo vegetation recovery in the first two years after a fire on Volcán  
420 Chiles, Ecuador. In: Ramsay PM (ed) *The Ecology of Volcán Chiles: high-altitude*  
421 *ecosystems on the Ecuador-Colombia border*. Pebble & Shell, Plymouth, pp 65–73
- 422 Ramsay PM, Oxley ERB (1996) Fire temperatures and postfire plant community dynamics in  
423 Ecuadorian grass paramo. *Vegetatio* 124:129–144 doi:10.1007/BF00045489
- 424 Ramsay PM, Oxley ERB (1997) The growth form composition of plant communities in the  
425 Ecuadorian paramos. *Plant Ecology* 131:173–192 doi:10.1023/A:1009796224479
- 426 Ratajczak Z, Nippert JB, Collins SL (2012) Woody encroachment decreases diversity across North  
427 American grasslands and savannas. *Ecology* 93:697–703 doi:10.1890/11-1199.1
- 428 Rivadeneira G, Ramsay PM, Montúfar R (2020) Fire regimes and pollinator behaviour explain  
429 the genetic structure of *Puya hamata* (Bromeliaceae) rosette plants. *Alpine Botany*  
430 130:13–23 doi:10.1007/s00035-020-00234-7
- 431 Sarmiento FO, Frolich LM (2002) Andean cloud forest tree lines - naturalness, agriculture and  
432 the human dimension. *Mountain Research and Development* 22:278–287  
433 doi:10.1659/0276-4741(2002)022[0278:ACFTL]2.0.CO;2
- 434 Sklenář P, Ramsay PM (2001) Diversity of zonal páramo plant communities in Ecuador. *Diversity*  
435 *and Distributions* 7:113–124 doi:10.1046/j.1472-4642.2001.00101.x
- 436 Smith AP, Young TP (1987) Tropical alpine plant ecology. *Annual Review of Ecology and*  
437 *Systematics* 18:137–158 doi:10.1146/annurev.es.18.110187.001033
- 438 Smith JMB, Cleef AM (1988) Composition and origins of the world's tropicalpine floras. *Journal*  
439 *of Biogeography* 15:631–645 doi:10.2307/2845441
- 440 Smith TM, Huston MA (1989) A theory of the spatial and temporal dynamics of plant  
441 communities. *Vegetatio* 83:49–69 doi:10.1007/BF00031680
- 442 Stewart KEJ, Bourn NAD, Thomas JA (2001) An evaluation of three quick methods commonly  
443 used to assess sward height in ecology. *Journal of Applied Ecology* 38:1148–1154  
444 doi:10.1046/j.1365-2664.2001.00658.x
- 445 Suárez E, Medina G (2001) Vegetation structure and soil properties in Ecuadorian paramo  
446 grasslands with different histories of burning and grazing. *Arctic, Antarctic, and Alpine*  
447 *Research* 33:158–164 doi:10.1080/15230430.2001.12003418
- 448 Valdospinos Navas CM (2008) Aplicación del modelo de mapeo del peligro de incendio forestal  
449 usando Sistemas de Información Geográfica para evaluar el peligro de incendios de la  
450 vegetación en el páramo. Estudio de caso: Reserva Ecológica El Ángel. Pontificia  
451 Universidad Católica del Ecuador
- 452 Vargas-Ríos O (1997) Un modelo de sucesión-regeneración de los páramos después de quemadas.  
453 *Caldasia* 19:331–345
- 454 Vargas Ríos O (2011) Los regímenes de estrés y disturbio en los páramos andinos. *Colombia*  
455 *Tiene Páramos (Bogotá)* 1:58–73

- 456 Verweij PA, Kok K (1992) Effects of fire and grazing on *Espeletia hartwegiana* populations. In:  
457 Balslev H, Luteyn JL (eds) *Páramo: An Andean Ecosystem under Human Influence*.  
458 London, Academic Press, pp 215–229
- 459 Walker LR, Wardle DA, Bardgett RD, Clarkson BD (2010) The use of chronosequences in studies  
460 of ecological succession and soil development. *Journal of Ecology* 98:725-736  
461 doi:10.1111/j.1365-2745.2010.01664.x
- 462 White S (2013) Grass paramo as hunter-gatherer landscape. *Holocene* 23:898-915  
463 doi:10.1177/0959683612471987
- 464 Wilson JB (1999) Guilds, functional types and ecological groups. *Oikos* 86:507–522  
465 doi:10.2307/3546655
- 466 Zavaleta ES, Kettley LS (2006) Ecosystem change along a woody invasion chronosequence in a  
467 California grassland. *Journal of Arid Environments* 66:290-306  
468 doi:10.1016/j.jaridenv.2005.11.008
- 469 Zomer MA, Ramsay PM (in review) The impact of fire intensity on plant growth forms in high-  
470 altitude Andean grassland. *Biodiversity and Conservation*
- 471



472 **Fig. 1**

473 Fig. 1. Three phases of plant growth form diversity response through time after fire for 16 plots.  
474 The plot at 40 y since fire was not burned during this time and might have been unburned for  
475 even longer. Part of the x-axis has been omitted.

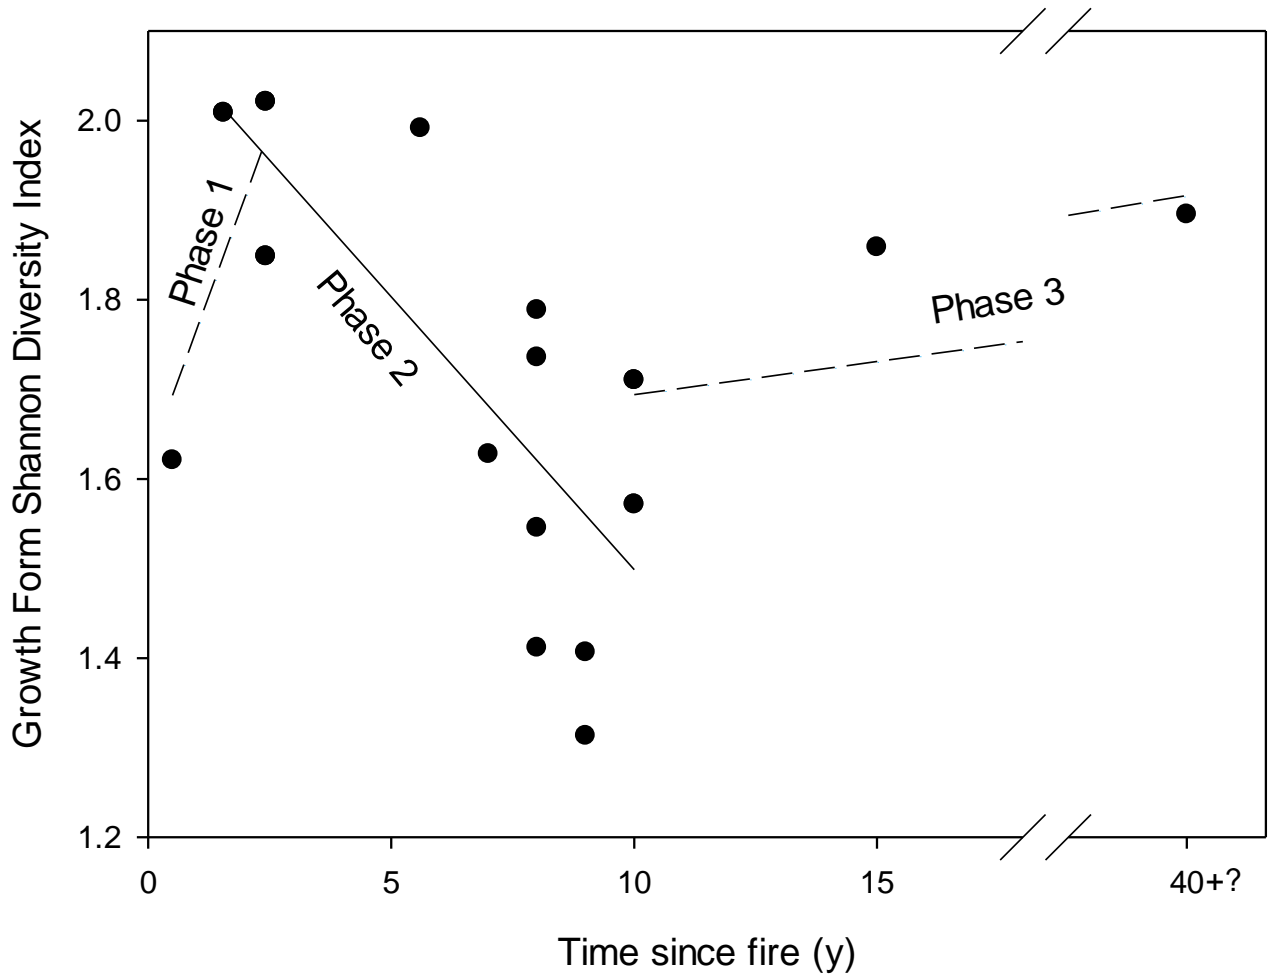

476

477

478 Fig. 2. Non-metric Multidimensional Scaling ordination of plant growth form composition based  
479 on presence absence data for 100m<sup>2</sup> plots. Each plot is represented by a point, labelled with  
480 the time since fire in years. The distance between plots in the ordination diagram shows the  
481 difference between them in growth form composition. The further a site is from another in the  
482 diagram, the greater the difference in composition. The dotted line highlights a divide between  
483 plant growth form assemblages 0.5–5.6 year since fire and 7–10 y since fire.

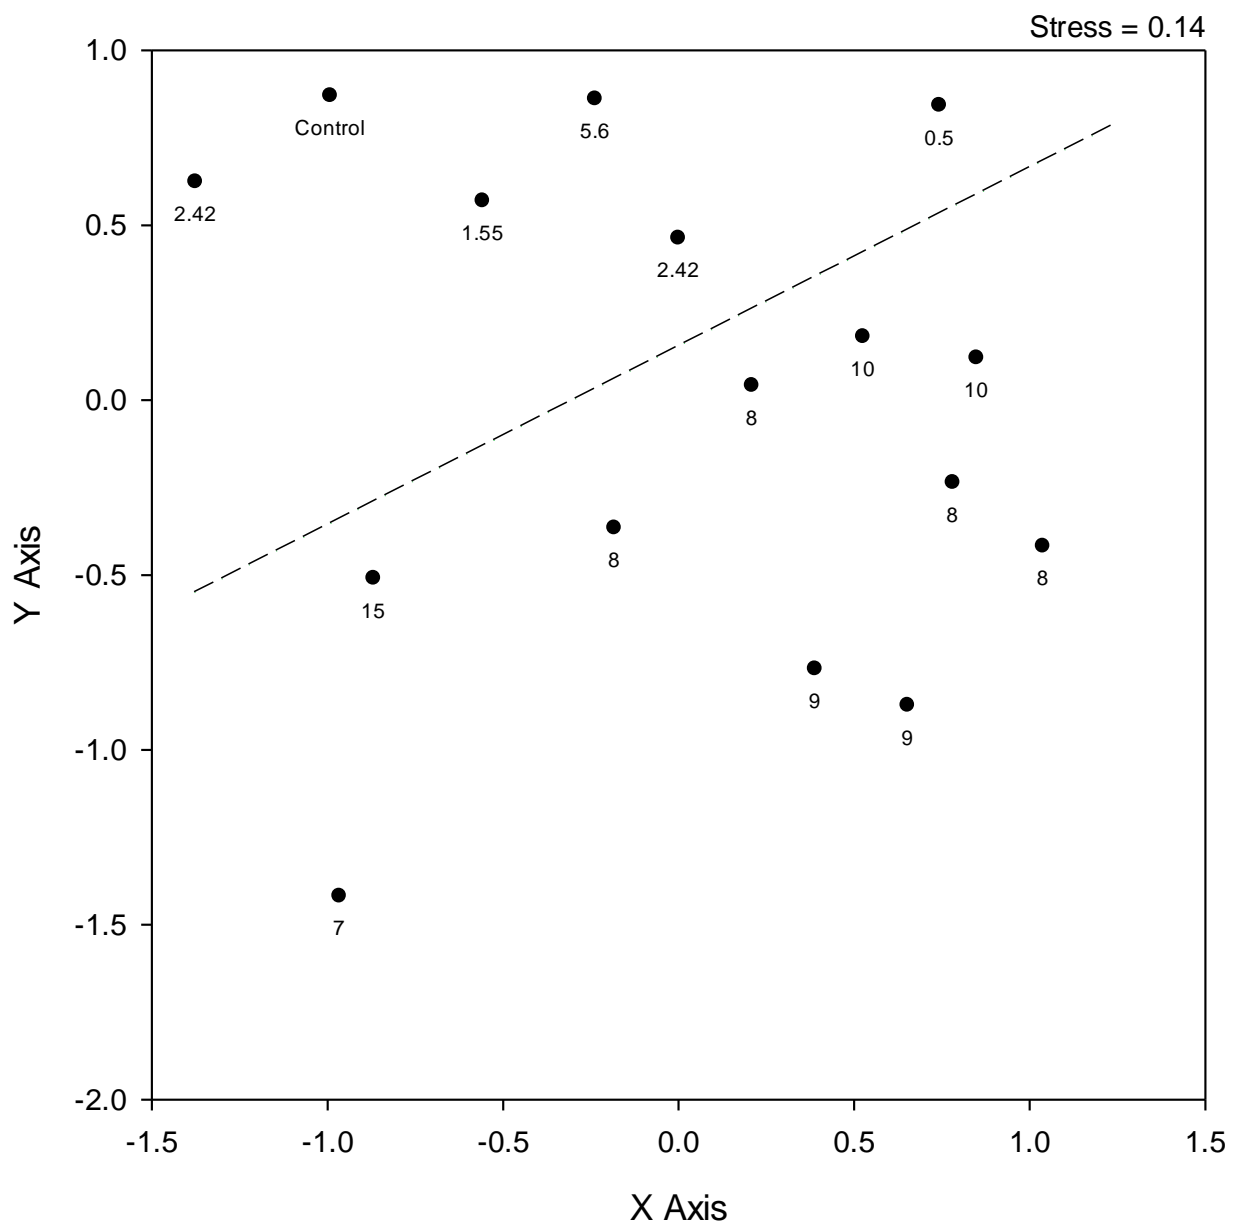

484

485

486 Fig. 3. Growth form diversity and richness in thirteen páramo sites, 1.5–10 y after fire. A.  
487 Shannon's diversity index ( $R^2=0.565$ , fitted line  $y=2.11-0.06x$ ). B. Growth form richness (of 10  
488 growth forms).

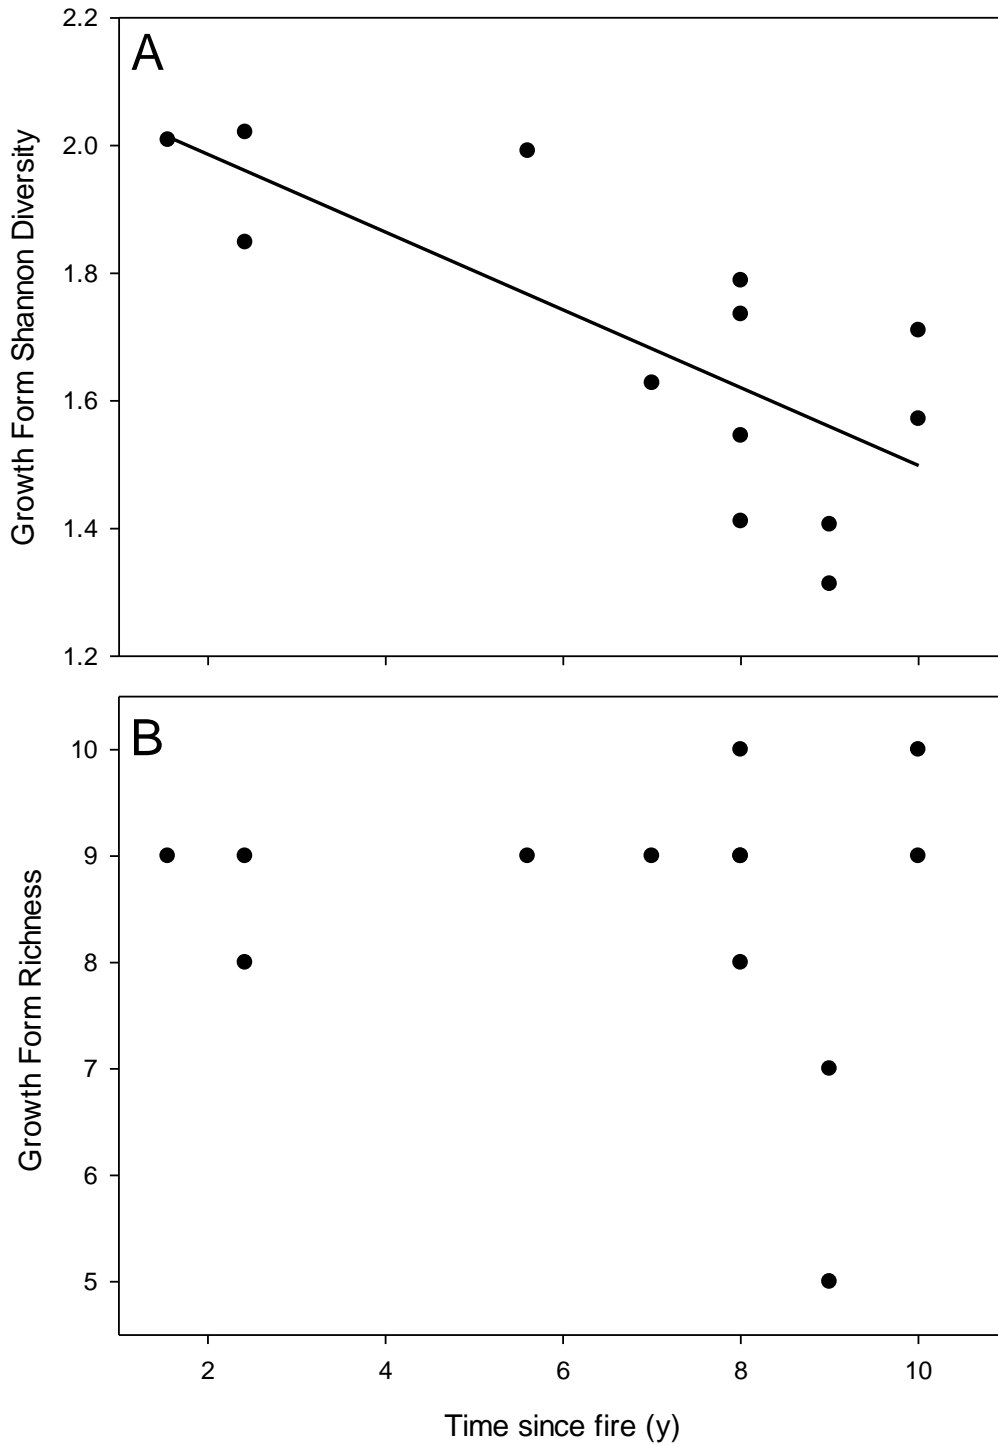

489

490

491 Fig. 4. Frequency of four plant growth forms in 100m<sup>2</sup> plots of differing times since fire, 1.5–10  
492 y after fire. (a) prostrate herbs ( $R^2=0.551$ ,  $y=50.14-4.5x$ ) ; (b) prostrate shrubs ( $R^2=0.621$ ,  
493  $y=71.01-6.93x$ ) ; (c) cushions & mats ( $R^2=0.385$ ,  $y=37.52-3.19x$ ); (d) giant basal rosettes  
494 ( $R^2=0.459$ ,  $y=36.82-3.39x$ ).

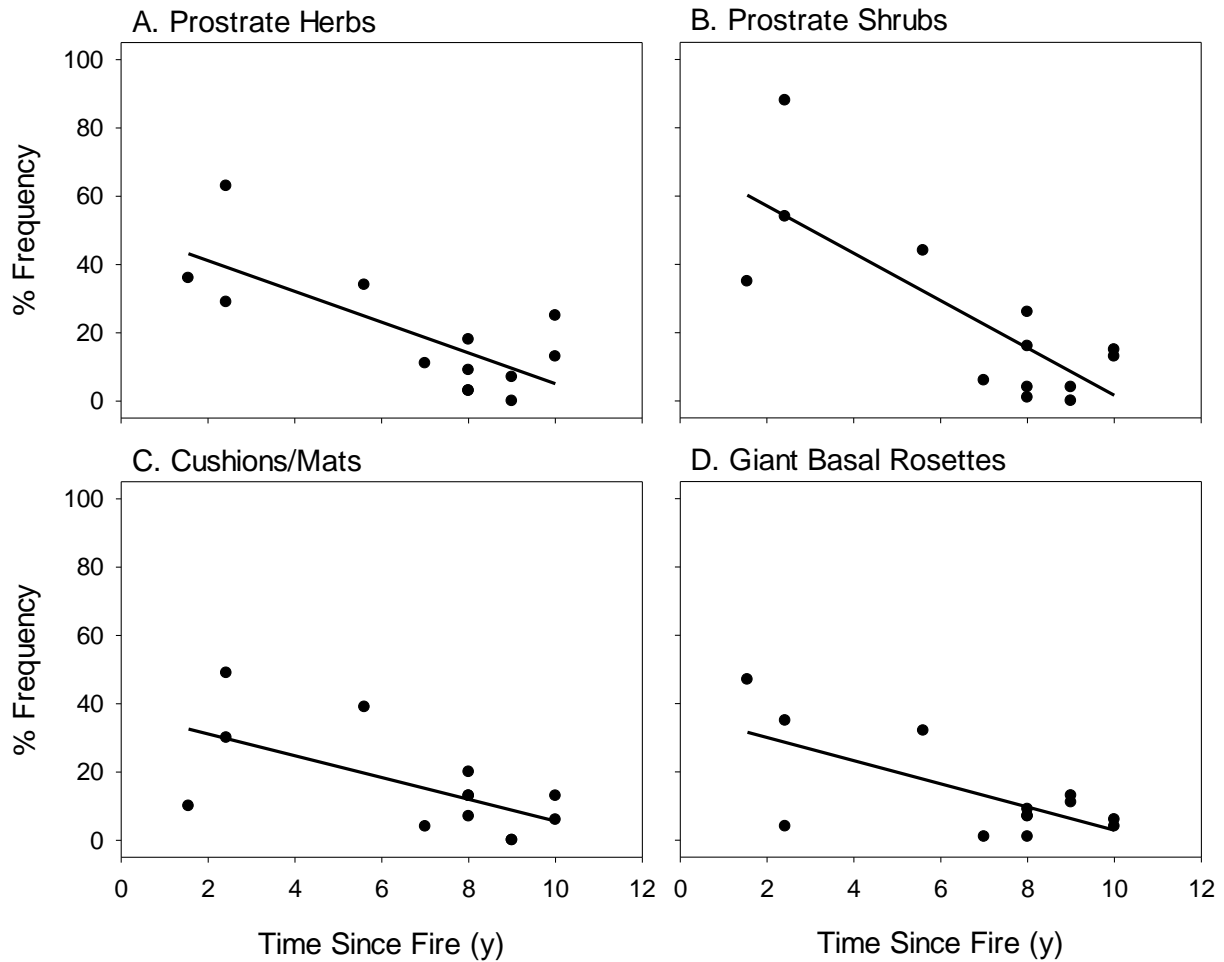

495

496

497 Fig. 5. Frequencies of six growth forms in 100 m<sup>2</sup> plots in plots 1.5–10 y after fire. A. Tussock  
498 grasses. B. Giant stem rosettes. C. Upright shrubs. D. Erect herbs. E. Acaulescent rosettes. F.  
499 Trailing herbs.

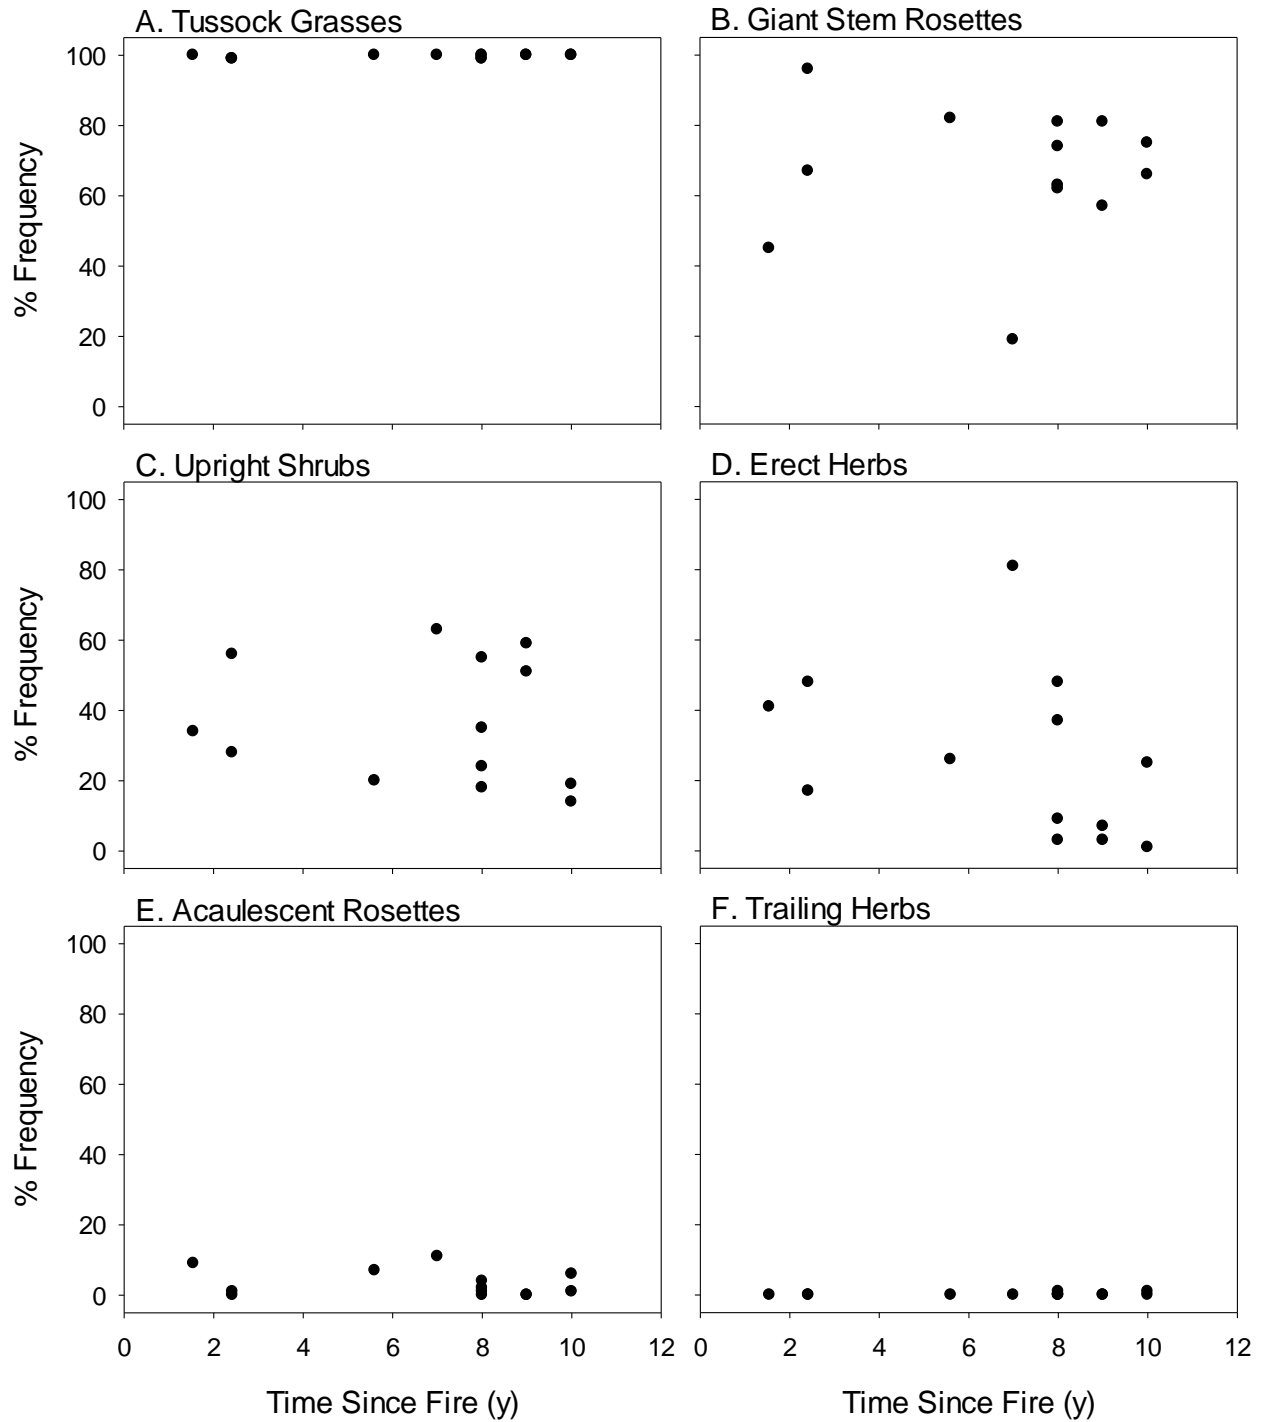

500

501

502 Fig. 6. Changes in vegetation height, soil temperature and light conditions at the soil surface. A.  
503 Mean vegetation height ( $R^2=0.553$ ,  $y=16.91+3.67x$ ). B. Mean soil temperatures at 20 cm depth  
504 ( $R^2=0.757$ ,  $y=8.9-0.3x$ ). C. Medians of photosynthetically active radiation (PAR) reaching ground  
505 level, as a percentage of the incident light above the vegetation canopy ( $n=50$  for each plot;  
506  $R^2=0.431$ ,  $y=55.5-5.51x$ ). D. Proportion of medians that were <10% incident PAR reaching  
507 ground level ( $n=50$  for each plot;  $R^2=0.683$ ,  $y=10.16x-10.78$ ).

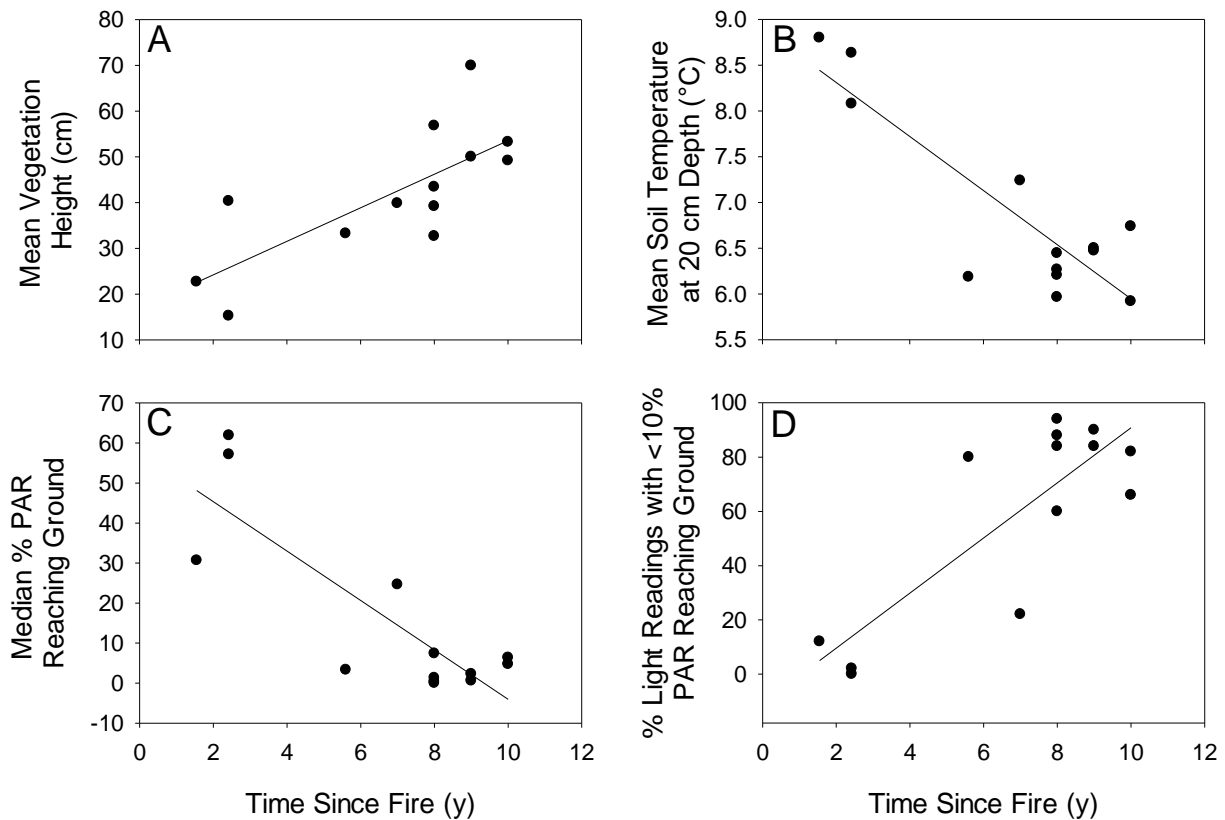

508

509

510 Fig. 7. Schematic summary of responses of ten páramo growth forms to fire and their  
 511 interactions during three phases of post-fire succession. Growth forms: GSR = giant stem  
 512 rosette, GBR = giant basal rosette, T = tussock, US = upright shrub, CM = cushion or mat, PS =  
 513 prostrate shrub, PH = prostrate herb, AR = acaulescent rosette, EH = erect herb, TH = trailing  
 514 herb.

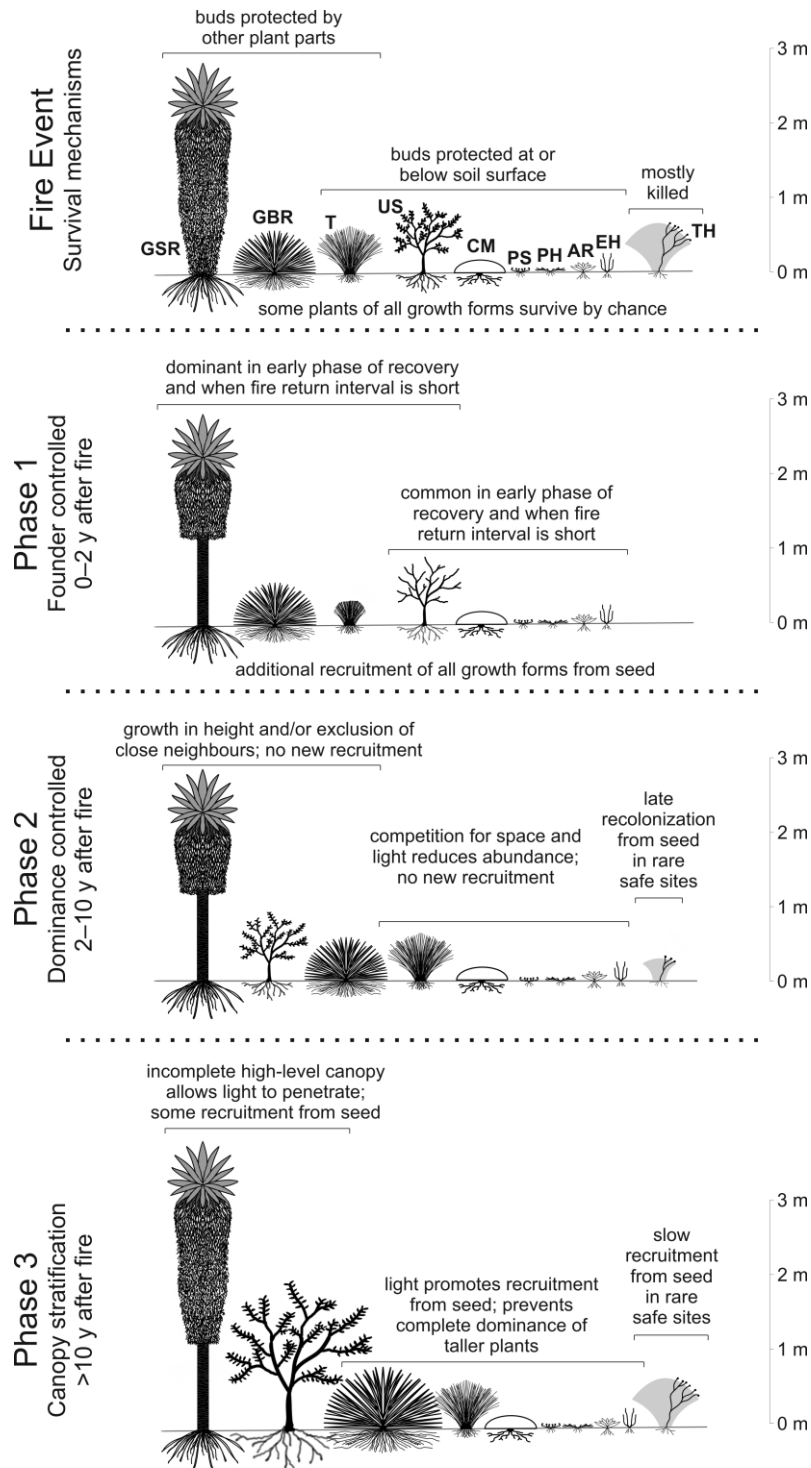

515
